# Supplementary material for: Anticancer effects of Poncirus fructus on hepatocellular carcinoma through regulation of apoptosis, migration, and invasion
Source: PubMed Central journal article supplement — Oncol Rep. 2020 Oct 5;44(6):2537–46. doi: 10.3892/or.2020.7790 (PMC7640358; doi:10.3892/or.2020.7790), 2020-10-05
Supplement: Supplementary_Data.pdf [file Supplementary_Data.pdf]

Table SI. Effects of *Poncirus fructus* (PF) in cancer and non-cancer disease.

| Study no. | Target                                                                                                         | Mode of action              | (Refs.) |
|-----------|----------------------------------------------------------------------------------------------------------------|-----------------------------|---------|
| 1         | Induces apoptosis via mitochondrial autophagy in colorectal cancer cells                                       | Anticancer                  | (1)     |
| 2         | Anti-proliferative and antioxidant effects in Rat benign prostatic hyperplasia                                 | Non-cancer                  | (2)     |
| 3         | Induces apoptosis in human promyelocytic leukemia cells                                                        | Anticancer                  | (3)     |
| 4         | Induces apoptosis and cell cycle arrest in human hepatocarcinoma cells                                         | Anticancer                  | (4)     |
| 5         | Inhibits <i>Helicobacter pylori</i> growth                                                                     | Anti-bacterial              | (5)     |
| 6         | Growth inhibition and promoting cell apoptosis in liver cancer cells (SNU 449) and colon cancer cells (HCT-15) | Anticancer                  | (6)     |
| 7         | Induces autophagic cell death in human oral cancer cells (HSC-4)                                               | Anticancer                  | (7)     |
| 8         | Inhibits cell growth in human breast cancer cells (MDA-MB-231)                                                 | Anticancer                  | (8)     |
| 9         | Inhibits inflammation and secretion of gastric juice and maintain pH                                           | Anti-ulcer and anti-gastric | (9)     |

## References

1. Kim SY, Yi HK, Yun BS, Lee DY, Hwang PH, Park HR and Kim MS: The extract of the immature fruit of *Poncirus trifoliata* induces apoptosis in colorectal cancer cells via mitochondrial autophagy. *Food Sci Hum Wellness*, 2020. <https://doi.org/10.1016/j.fshw.2020.05.001>.
2. Jeon WY, Kim OS, Seo CS, Jin SE, Kim JA, Shin HK, Kim YU and Lee MY: Inhibitory effects of *Poncirus fructus* on testosterone-induced benign prostatic hyperplasia in rats. *BMC Complement Altern Med* 17: 384, 2017.
3. Yi JM, Kim MS, Koo HN, Song BK, Yoo YH and Kim HM: *Poncirus trifoliata* fruit induces apoptosis in human promyelocytic leukemia cells. *Clin Chim Acta* 340: 179-185, 2004.
4. Hong J, Min HY, Xu GH, Lee JG, Lee SH, Kim YS, Kang SS and Lee SK: Growth inhibition and G1 cell cycle arrest mediated by 25-methoxyhispidol A, a novel triterpenoid, isolated from the fruit of *Poncirus trifoliata* in human hepatocellular carcinoma cells. *Planta Med* 74: 151-155, 2008.
5. Kim DH, Bae EA and Han MJ: Anti-*Helicobacter pylori* activity of the metabolites of poncirin from *Poncirus trifoliata* by human intestinal bacteria. *Biol Pharm Bull* 22: 422-424, 1999.
6. Rahman A, Alam Siddiqui S, Jakhar R and Chul Kang S: Growth inhibition of various human cancer cell lines by imperatorin and limonin from *Poncirus Trifoliata* Rafin. seeds. *Anticancer Agents Med Chem* 15: 236-241, 2015.
7. Han HY, Park BS, Lee GS, Jeong SH, Kim H and Ryu MH: Autophagic cell death by *Poncirus trifoliata* Rafin., a traditional oriental medicine, in human oral cancer HSC-4 cells. *Evid Based Complement Alternat Med* 2015: 394263, 2015.
8. Chung HJ, Park EJ, Pyee Y, Hua Xu G, Lee SH, Kim YS and Lee SK: 25-Methoxyhispidol A, a novel triterpenoid of *Poncirus trifoliata*, inhibits cell growth via the modulation of EGFR/c-Src signaling pathway in MDA-MB-231 human breast cancer cells. *Food Chem Toxicol* 49: 2942-2946, 2011.
9. Lee JH, Lee SH, Kim YS and Jeong CS: Protective effects of neohesperidin and poncirin isolated from the fruits of *Poncirus trifoliata* on potential gastric disease. *Phytother Res* 23: 1748-1753, 2009.
